# Supplementary material for: Defining Signatures of Arm-Wise Copy Number Change and Their Associated Drivers in Kidney Cancers
Source: Int J Mol Sci. 2019 Nov 16;20(22):5762. doi: 10.3390/ijms20225762 (PMC6887958; doi:10.3390/ijms20225762)
Supplement: Supplementary file 1 [file ijms-20-05762-s001.zip › supplementary tables.xlsx]

## Sheet: All importance
n	arm	AKAP9	ATM	BAP1	PBRM1	PIK3CA	PTEN	RANBP2	SETD2	TP53	VHL	VHL & PBRM1
1	1p	0.0384849	0.03315	0.0366992	0.0125767	0.0194578	0.0229185	0.021638	0.0324586	0.00530186	0.0110962	0.0229005
2	1q	0.0276201	0.0213166	0.0223075	0.0202979	0.0267395	0.0260882	0.0263597	0.0285534	0.0131356	0.0398219	0.0205396
3	2p	0.025403	0.0389603	0.0285965	0.0253299	0.0205535	0.0294238	0.0307093	0.0274624	0.0106545	0.0119216	0.0223294
4	2q	0.0232112	0.0209109	0.0157417	0.0114523	0.0126737	0.0198516	0.0199489	0.0175634	0.00736897	0.0122722	0.01824
5	3p	0.0214485	0.023886	0.0844836	0.109811	0.0329697	0.0177576	0.0217084	0.0290639	0.0188958	0.0915035	0.0746049
6	3q	0.0222836	0.0254341	0.0690698	0.0257974	0.0153016	0.0293831	0.0186327	0.0253621	0.0297135	0.0206875	0.0188445
7	4p	0.0208311	0.0254598	0.021994	0.0142645	0.022157	0.0196427	0.0324303	0.0300022	0.0124136	0.0093849	0.0183614
8	4q	0.0281954	0.039096	0.0166304	0.0144584	0.0194438	0.0295709	0.0199854	0.0225325	0.0306019	0.0235242	0.022195
9	5p	0.0252213	0.0241866	0.015571	0.0153513	0.015478	0.0138538	0.0373871	0.0211293	0.00875062	0.0131875	0.0137732
10	5q	0.0321791	0.0356971	0.0331395	0.0884764	0.0196681	0.0178972	0.0308056	0.0256133	0.0378426	0.130553	0.0763348
11	6p	0.0196261	0.0330254	0.0137589	0.0258381	0.0243671	0.0211444	0.0513154	0.0215318	0.00606838	0.0167702	0.0266542
12	6q	0.0175748	0.025732	0.0151278	0.014599	0.0341585	0.0307357	0.0263948	0.0184556	0.0102643	0.0103479	0.0179075
13	7p	0.0182498	0.013374	0.0159387	0.0152203	0.0167794	0.0156522	0.0164431	0.0156581	0.0321705	0.014882	0.0145272
14	7q	0.020833	0.0225642	0.0420063	0.0138334	0.0172358	0.0207871	0.0211255	0.031943	0.00730461	0.0145829	0.0155007
15	8p	0.0252884	0.0205046	0.0139313	0.0190393	0.0155759	0.026209	0.0225173	0.0172364	0.00960682	0.0178542	0.0184635
16	8q	0.0199419	0.0340217	0.0197802	0.0497991	0.0287115	0.0239298	0.0214092	0.0251162	0.0827944	0.0633294	0.0315707
17	9p	0.0225782	0.0181449	0.035673	0.0294932	0.0225533	0.023793	0.0331029	0.0266987	0.0116982	0.00887026	0.0262728
18	9q	0.0137079	0.0275237	0.0185334	0.00943015	0.0333495	0.0310887	0.0177544	0.0169906	0.0158619	0.00844578	0.0221247
19	10p	0.0217452	0.0128469	0.0137984	0.0108011	0.019305	0.054703	0.0336046	0.02438	0.0193647	0.00989474	0.00953772
20	10q	0.0232004	0.0151089	0.0190416	0.0197978	0.0234675	0.0343903	0.0150993	0.0140863	0.00781685	0.0131537	0.0252835
21	11p	0.0199387	0.0208767	0.0163061	0.0294018	0.0154486	0.0262401	0.0209095	0.0199	0.0141454	0.0222295	0.0298752
22	11q	0.0304532	0.0161603	0.0178433	0.0116008	0.01822	0.0220782	0.0261877	0.0337201	0.0318942	0.0101542	0.0133035
23	12p	0.0334693	0.0256408	0.0188311	0.0124077	0.024675	0.0373754	0.0218932	0.0394907	0.00996552	0.0163182	0.0148132
24	12q	0.018431	0.0196686	0.0158805	0.0146957	0.0129229	0.0165784	0.013631	0.0164631	0.00911001	0.0159964	0.0153721
25	13q	0.0216712	0.016454	0.018668	0.0149069	0.0356328	0.0176798	0.0254532	0.0280028	0.0714011	0.0197566	0.0241137
26	14q	0.0256115	0.0288901	0.0175184	0.0137456	0.0174811	0.0361529	0.0218825	0.0222946	0.00843538	0.0109069	0.0252139
27	15q	0.0257317	0.0209021	0.0219439	0.0315957	0.0178057	0.0186567	0.0200609	0.0256311	0.00806647	0.0149843	0.0279321
28	16p	0.031383	0.0290192	0.0282652	0.0182738	0.0206375	0.0209413	0.019891	0.024024	0.00587821	0.022114	0.0201134
29	16q	0.0304163	0.0352534	0.0209393	0.0386312	0.0209032	0.0213444	0.026017	0.0252299	0.00858626	0.0514203	0.0394583
30	17p	0.03195	0.0400046	0.029108	0.0453902	0.0240274	0.0252863	0.0333601	0.0221478	0.0505863	0.0481476	0.0576093
31	17q	0.0141096	0.0174067	0.0139228	0.0244647	0.0232794	0.016652	0.0167407	0.0153486	0.0160259	0.0119071	0.0163802
32	18p	0.0193373	0.0116982	0.0113226	0.0215543	0.0123703	0.0118554	0.012414	0.0115075	0.0207348	0.00900213	0.0145335
33	18q	0.0306431	0.0181991	0.0224214	0.0241721	0.0306304	0.0184783	0.0196877	0.0241589	0.056684	0.0274713	0.0271561
34	19p	0.0153968	0.0151222	0.0131632	0.0126611	0.0120225	0.0191637	0.0154788	0.00893369	0.00767364	0.0108177	0.00989449
35	19q	0.018883	0.0201389	0.0204521	0.0156846	0.0230051	0.0207152	0.0208189	0.0344194	0.0351181	0.0130592	0.0147112
36	20p	0.0427918	0.0285995	0.0245772	0.0203063	0.0434811	0.0304256	0.024859	0.0276963	0.0134613	0.0113093	0.0153437
37	20q	0.0347019	0.0187944	0.0494306	0.0263872	0.0884087	0.0349728	0.0241576	0.0566913	0.164102	0.0464917	0.0258535
38	21p	0.0155556	0.0158797	0.0177523	0.0105552	0.0297906	0.0155225	0.0310359	0.0191341	0.018754	0.00748999	0.0201447
39	21q	0.0144164	0.0146016	0.0119496	0.0101223	0.0143068	0.0171054	0.0151489	0.011824	0.0266092	0.019378	0.0106915
40	22q	0.021485	0.039746	0.0218812	0.021775	0.0390046	0.0279549	0.0360005	0.0255445	0.00913843	0.0329617	0.0255203
	AUC	0.697624	0.548092	0.686194	0.658087	0.487323	0.59564	0.575543	0.549668	0.712957	0.89489

## Sheet: KIRC importance
n	arm	AKAP9	ATM	BAP1	PBRM1	PIK3CA	PTEN	RANBP2	SETD2	TP53	VHL	VHL & PBRM1
1	1p	0.0604824	0.022703	0.0116913	0.0195007	0.0369895	0.0259741	0.0232874	0.0614912	0.025468	0.0228459	0.0309214
2	1q	0.0331433	0.0282524	0.0333308	0.021199	0.0212308	0.0314228	0.0331646	0.0170332	0.0177418	0.0899201	0.0128644
3	2p	0.046017	0.0303519	0.0242959	0.0145453	0.0308693	0.014233	0.0343679	0.0161227	0.0154352	0.0179126	0.0251571
4	2q	0.0183654	0.0244674	0.0162601	0.0219119	0.0548652	0.01334	0.0214151	0.0167731	0.0554899	0.013881	0.0468587
5	3p	0.00576139	0.0120917	0.00486165	0.0216523	0.00999264	0.0121897	0.0118566	0.00816444	0.0135581	0.0116681	0.0112226
6	3q	0.0236513	0.0191475	0.0350314	0.0156831	0.0182968	0.0187369	0.036003	0.0259237	0.0236512	0.0341913	0.0179586
7	4p	0.0213879	0.0213726	0.0400995	0.00867931	0.040171	0.0197882	0.016791	0.0152161	0.0377031	0.015942	0.0225117
8	4q	0.0115599	0.0204158	0.00871698	0.00679311	0.0126897	0.0153818	0.0128886	0.0453272	0.0207125	0.0281482	0.00788177
9	5p	0.0157226	0.0295943	0.0147603	0.0136297	0.0135078	0.0310118	0.0181039	0.0198285	0.018112	0.0130031	0.0138005
10	5q	0.0214704	0.0229778	0.0260664	0.0110535	0.0201329	0.0413972	0.0253479	0.0122297	0.0193449	0.0213103	0.0251053
11	6p	0.0147503	0.0125005	0.0274453	0.0162249	0.0160445	0.027646	0.0191807	0.0189741	0.019926	0.0176999	0.0150814
12	6q	0.0238355	0.047726	0.0157435	0.0544317	0.0282315	0.0451382	0.0385521	0.0319126	0.0301058	0.0256688	0.0363852
13	7p	0.0249933	0.025339	0.0209796	0.0347261	0.018304	0.0117445	0.0260655	0.027723	0.0116448	0.0368698	0.019968
14	7q	0.0515084	0.0161762	0.0555493	0.0390334	0.0147392	0.030737	0.0165002	0.0188685	0.0243715	0.029332	0.02362
15	8p	0.0127652	0.0382304	0.0337306	0.0177265	0.0492535	0.0256148	0.0404405	0.0205187	0.055704	0.0310291	0.0111237
16	8q	0.0150528	0.00927878	0.0140531	0.0110963	0.0174819	0.00981015	0.016415	0.0163948	0.0121663	0.00658082	0.0108112
17	9p	0.0322854	0.0107989	0.0323495	0.0277764	0.0272383	0.0138062	0.0337065	0.0283469	0.0165876	0.0279492	0.0278348
18	9q	0.0321333	0.0295595	0.0228486	0.019711	0.0161552	0.0181266	0.0153802	0.0481636	0.0242571	0.041436	0.0583938
19	10p	0.0082871	0.012392	0.0141506	0.0245306	0.0142108	0.00506522	0.0129913	0.0108485	0.0117865	0.00879689	0.016124
20	10q	0.0133804	0.0301621	0.0101035	0.0422026	0.027252	0.0439579	0.0367658	0.020192	0.0336066	0.0246884	0.0387573
21	11p	0.0359744	0.0106596	0.0231773	0.0146429	0.0342618	0.0144075	0.0139024	0.0198313	0.0310289	0.0142616	0.011524
22	11q	0.00873452	0.0238708	0.0142503	0.00838918	0.00934798	0.0138557	0.0171671	0.0121336	0.0227295	0.015644	0.00687331
23	12p	0.0182886	0.032918	0.0318529	0.0270241	0.016113	0.0532095	0.0381635	0.0215313	0.0337103	0.0249903	0.031981
24	12q	0.0171521	0.0285209	0.0123014	0.0412677	0.020796	0.0146053	0.00985147	0.0151937	0.0190136	0.0115919	0.0428164
25	13q	0.014554	0.00990239	0.0058371	0.0168819	0.00728752	0.00817455	0.00776749	0.0154413	0.00737754	0.0116354	0.0354898
26	14q	0.0265195	0.0304698	0.0274513	0.0120236	0.0202667	0.0428964	0.0328473	0.0333677	0.0329777	0.0260851	0.0142414
27	15q	0.0265636	0.0364888	0.0246853	0.0409566	0.0293695	0.0168167	0.0156736	0.018748	0.0153473	0.0112646	0.0459
28	16p	0.0115196	0.0193883	0.00853148	0.0218921	0.0165862	0.031534	0.0140337	0.00950006	0.0169932	0.0120822	0.0198923
29	16q	0.0437861	0.0161567	0.0401849	0.015732	0.0315264	0.0145471	0.0426988	0.0260496	0.0159547	0.0367944	0.0200535
30	17p	0.02347	0.0138016	0.0319761	0.0763895	0.0216794	0.035397	0.0190686	0.0127813	0.0293633	0.0388578	0.0694891
31	17q	0.0147433	0.0174747	0.0323585	0.0052734	0.0355582	0.0116338	0.0238842	0.0232583	0.0334703	0.0267771	0.0131924
32	18p	0.00609217	0.0122924	0.0219643	0.0163845	0.00964445	0.00739408	0.00608504	0.0154146	0.00769605	0.00544074	0.00919726
33	18q	0.0224492	0.00648804	0.00566579	0.00471766	0.0100471	0.010182	0.0044861	0.0198505	0.00712006	0.0068877	0.00405774
34	19p	0.00389031	0.0162192	0.00947881	0.0112387	0.0150751	0.0156111	0.00603576	0.00699985	0.0179551	0.00832138	0.00764554
35	19q	0.0334266	0.0259049	0.0131657	0.00724237	0.0175907	0.0349984	0.0133687	0.023164	0.0193023	0.0142532	0.014762
36	20p	0.0260925	0.0134651	0.0294036	0.0440345	0.0334305	0.0259046	0.0376543	0.0156605	0.00999789	0.0119113	0.0104706
37	20q	0.0141771	0.0148791	0.0136777	0.0221304	0.0111508	0.0155274	0.0216917	0.0348263	0.00955678	0.014418	0.0126275
38	21p	0.00565624	0.00392695	0.0128178	0.00739031	0.00798727	0.014314	0.00913936	0.026243	0.00735035	0.0180378	0.010151
39	21q	0.00280579	0.0107761	0.00677702	0.00180335	0.00785957	0.00501824	0.0107444	0.00763682	0.00166718	0.00340351	0.00222569
40	22q	0.0095511	0.0448589	0.0243748	0.0144777	0.00876516	0.0108507	0.0185125	0.0143156	0.0260149	0.0204686	0.0190279
	AUC	0.444444	n/a	0.716049	0.521991	0.481481	0.26506	0.509375	0.519231	n/a	0.412353

## Sheet: Arm importance summary
	KIRP top genes			All top genes
Gene	Arm	Importance	Average SM	Arm	Importance	Average SM
AKAP9	1p	0.0624661	0.06042	20p	0.0427187	0.0406536
	2p	0.0552778	-0.126977	1p	0.0386541	-0.00883891
	16q	0.049854	0.049854	20q	0.0346118	0.0785916
ATM	6q	0.0522708	-0.0424933	17p	0.0400054	-0.0874937
	10q	0.0455067	-0.0668273	22q	0.0397504	-0.0122406
	22q	0.0431851	-0.0658728	4q	0.0390961	-0.0492822
BAP1	16q	0.0508461	-0.0733775	3p	0.0844836	-0.217501
	7q	0.0505276	-0.038646	3q	0.0690698	-0.0680187
	5q	0.044866	0.0934177	20q	0.0494303	0.0419824
PBRM1	17p	0.073944	0.0337023	3p	0.109827	-0.222322
	6q	0.053372	-0.0375276	5q	0.0884756	0.0423953
	12q	0.0509447	0.0637345	8q	0.0497993	0.0288211
PIK3CA	2q	0.0554547	-0.0540356	20q	0.0884086	0.149807
	8p	0.0444895	-0.182487	20p	0.0434753	0.115729
	1p	0.043818	-0.0169756	22q	0.0390669	-0.0107505
PTEN	6q	0.0474467	-0.0923759	10p	0.0547031	-0.0652983
	12p	0.0471056	-0.114133	12p	0.0373914	-0.0277426
	10q	0.0410093	-0.0677853	14q	0.0361706	-0.0316057
RANBP2	6q	0.0461237	-0.105374	6p	0.0513154	0.083863
	16q	0.0454496	0.0365519	5p	0.0373871	0.0890086
	10q	0.0401463	0.0401463	22q	0.0360005	-0.00852755
SETD2	4q	0.0530837	-0.0735198	20q	0.0566951	0.0477546
	9q	0.0497896	-0.0421095	12p	0.0394743	0.0367698
	1p	0.0488166	-0.0383608	19q	0.0344195	-0.0163894
TP53	4p	0.0567364	-0.194906	20q	0.164102	0.210304
	8p	0.049176	-0.252075	8q	0.0827592	0.191429
	10q	0.045313	0.0477005	13q	0.0713978	0.02469
VHL	1q	0.08938	-0.0528965	5q	0.130655	0.0965381
	17p	0.0401342	0.0694165	3p	0.0916241	-0.218941
	16q	0.038475	0.00643697	8q	0.063238	0.000722811
